# Supplementary material
Source: publisher figshare collection journal article supplement (https://frontiersin.figshare.com/ndownloader/files/14994848)
Supplement: Supplementary file [file 14994848]

A

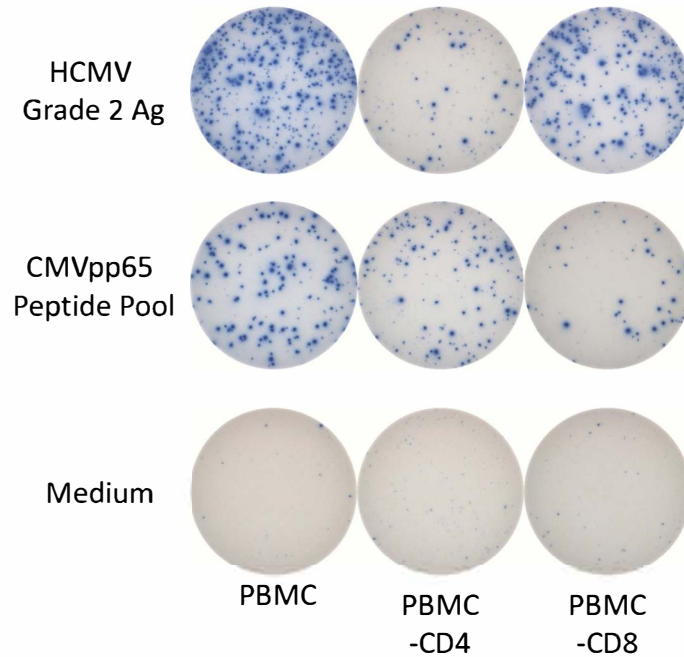

B

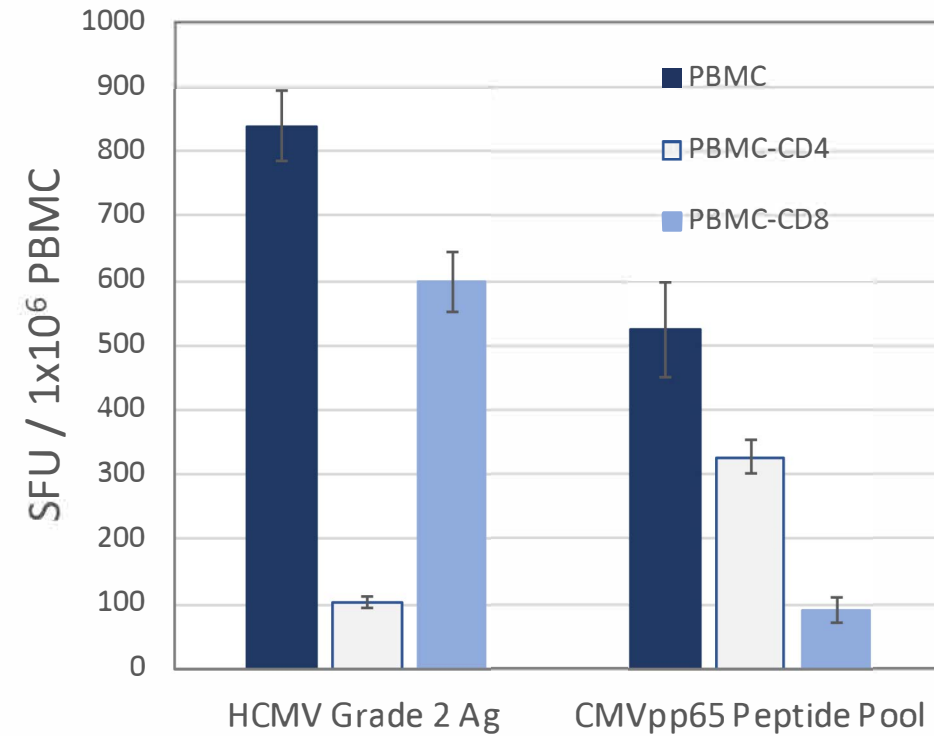

**Supplementary Figure 1.** The pp65 peptide pool, consisting of 15-mer peptides, recalls both CD4<sup>+</sup> and CD8<sup>+</sup> T cells. Unfractionated PBMC were tested in IFN-γ ELISPOT assays, along with the same PBMC following depletion of CD4<sup>+</sup> cells {PBMC-CD4} or CD8<sup>+</sup> cells {PBMC-CD8}. These cells were stimulated with UV-inactivated HCMV virions {HCMV Grade 2 Ag} or the 15-mer peptide pool that covers the pp65 aa sequence {CMV pp65 peptide pool}, as specified. Cells cultures in medium alone served as the negative control. (A) Representative wells, and (B) mean ± SD of 3 replicate wells for each condition are shown.
